# Supplementary material for: Excellent chiralselectivity in sulfur-bridged CoIIIMCoIII (M = NiII and PdII) trinuclear complexes containing 1,2-cyclohexanediamine
Source: Royal Society of Chemistry journal article supplement (doi:10.1039/b809265f), 2008-01-01
Supplement: b809265f.pdf [file b809265f.pdf]

## [Supporting Information]

### Excellent chiralselectivity in sulfur-bridged $\text{Co}^{\text{III}}\text{MCo}^{\text{III}}$ ( $\text{M} = \text{Ni}^{\text{II}}$ and $\text{Pd}^{\text{II}}$ ) trinuclear complexes containing 1,2-cyclohexanediamine

**Asako Igashira-Kamiyama,<sup>a</sup> Toshihiro Tamai,<sup>a</sup> Tatsuya Kawamoto<sup>b</sup> and  
Takumi Konno<sup>\*a</sup>**

<sup>a</sup> *Department of Chemistry, Graduate School of Science, Osaka University, Toyonaka, Osaka 560-0043, Japan*

<sup>b</sup> *Department of Chemistry, Faculty of Science, Kanagawa University, Hiratsuka, Kanagawa 259-1293, Japan*

\* To whom correspondence should be addressed.

E-mail: konno@chem.sci.osaka-u.ac.jp

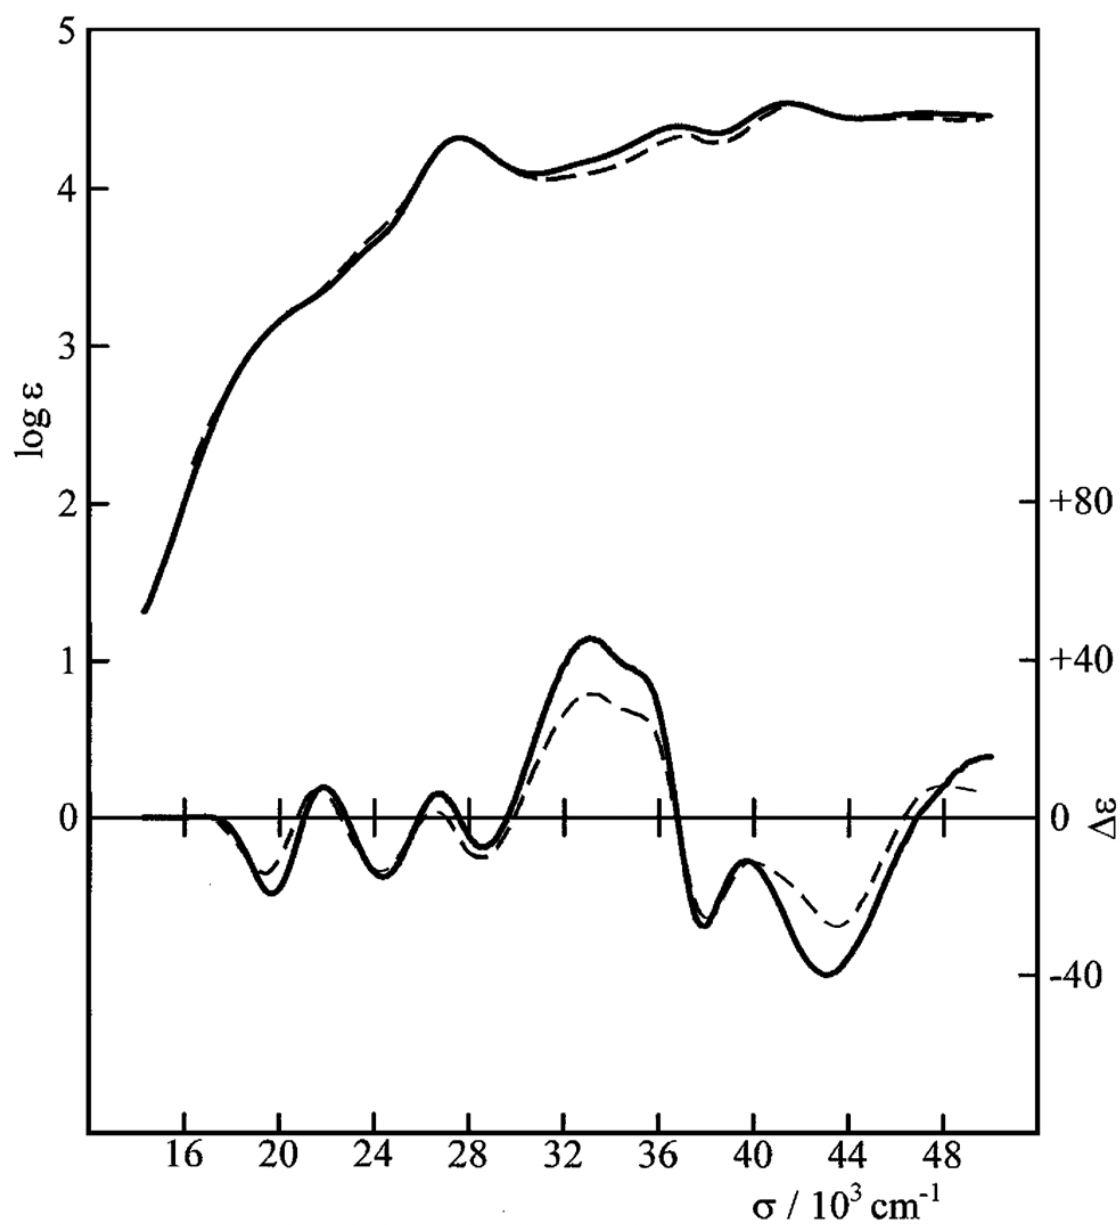

**Figure S1** Electronic absorption and CD spectra of  $\Delta_{RR}\Delta_{RR}$ -  $[\text{Ni}\{\text{Co}(\text{aet})_2(\text{R,R-chxn})\}_2]^{4+}$  ( $[\mathbf{1a}]^{4+}$ ) ( — ) and  $[\text{Ni}\{\text{Co}(\text{aet})_2(\text{en})\}_2]^{4+}$  ( - - - ).

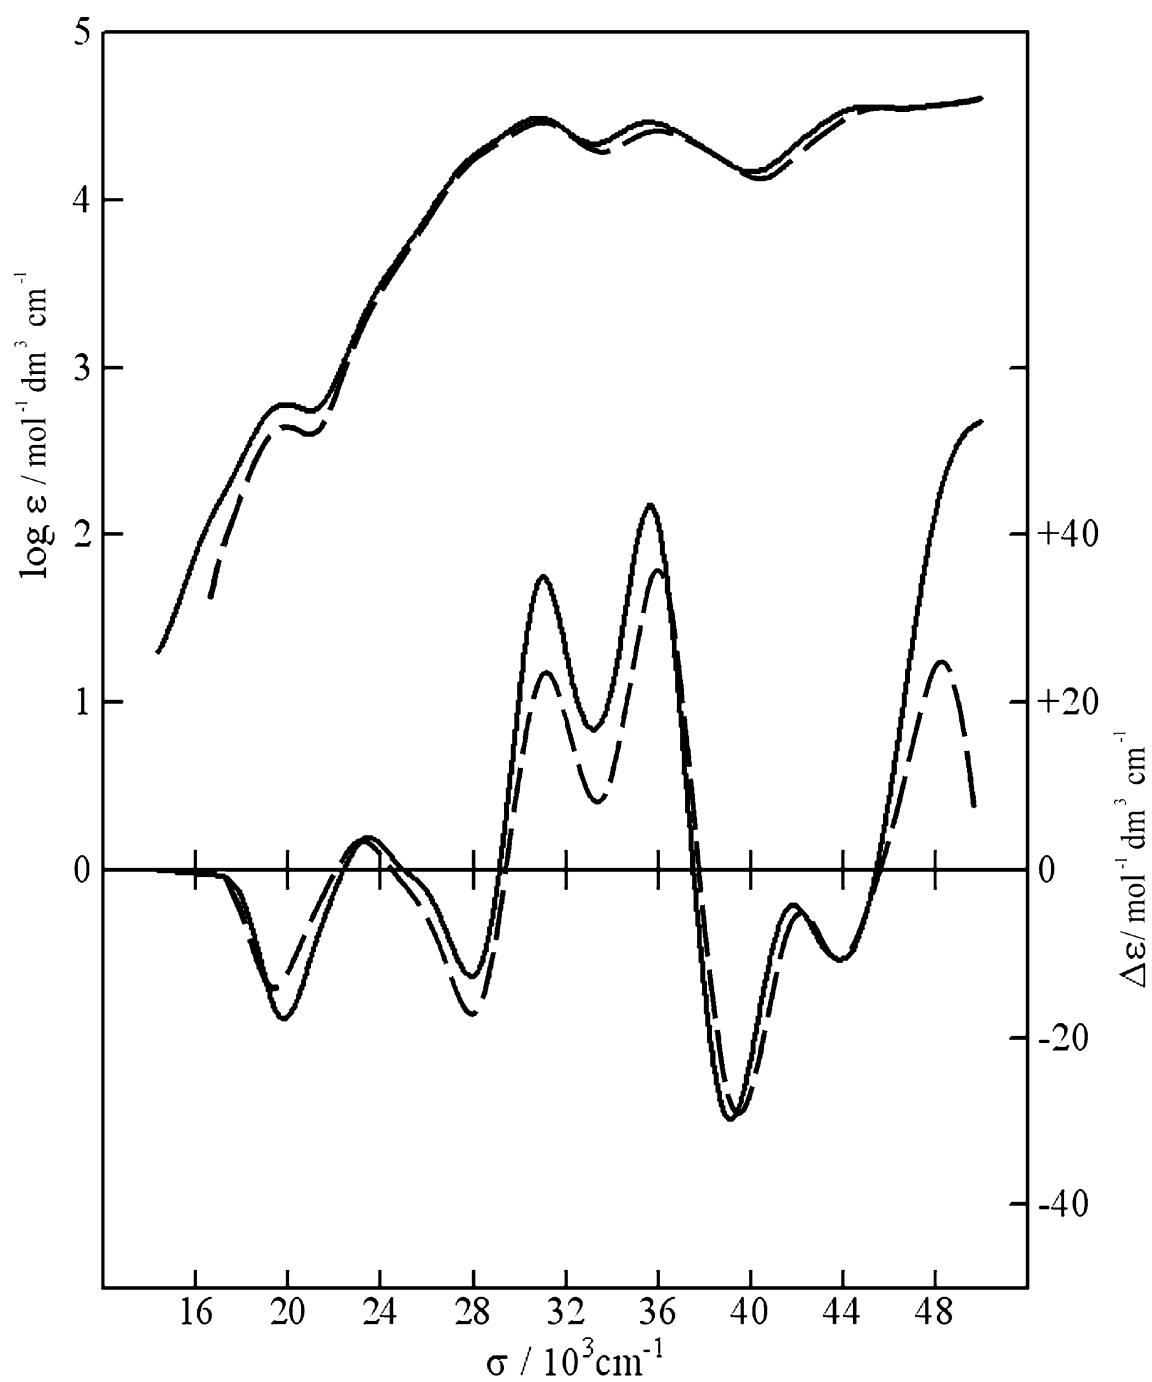

**Figure S2** Electronic absorption and CD spectra of  $\Delta_{RR}\Delta_{RR}$ -[Pd{Co(aet)<sub>2</sub>(*R,R*-chxn)}<sub>2</sub>]<sup>4+</sup> ([**2a**]<sup>4+</sup>) ( — ) and  $\Delta\Delta$ -[Pd{Co(aet)<sub>2</sub>(en)}<sub>2</sub>]<sup>4+</sup> ( - - - ).

**Table S1** Absorption and CD Spectral Data for  $[1a]^{4+}$  and  $[2a]^{4+}$ .

|                                 | log $\epsilon$ for abs           |                                 | $\Delta\epsilon$ for CD          |  |
|---------------------------------|----------------------------------|---------------------------------|----------------------------------|--|
| abs max:                        | max / mol <sup>-1</sup>          | CD extrema:                     | extrema / mol <sup>-1</sup>      |  |
| $\sigma / 10^3 \text{ cm}^{-1}$ | dm <sup>3</sup> cm <sup>-1</sup> | $\sigma / 10^3 \text{ cm}^{-1}$ | dm <sup>3</sup> cm <sup>-1</sup> |  |
| <b><math>[1a]^{4+}</math></b>   |                                  |                                 |                                  |  |
| 19.5                            | 3.1 <sup>sh</sup>                | 19.69                           | -19.33                           |  |
| 23.8                            | 3.7 <sup>sh</sup>                | 21.83                           | +7.71                            |  |
| 27.62                           | 4.31                             | 24.37                           | -15.15                           |  |
| 36.83                           | 4.38                             | 26.70                           | 6.11                             |  |
| 41.49                           | 4.52                             | 28.65                           | -7.50                            |  |
|                                 |                                  | 33.05                           | +45.51                           |  |
|                                 |                                  | 35.4                            | +35.6 <sup>sh</sup>              |  |
|                                 |                                  | 37.94                           | -27.67                           |  |
|                                 |                                  | 43.03                           | -40.00                           |  |
| <b><math>[2a]^{4+}</math></b>   |                                  |                                 |                                  |  |
| 19.92                           | 2.78                             | 19.76                           | -17.7                            |  |
| 23.8                            | 3.7 <sup>sh</sup>                | 23.49                           | +3.9                             |  |
| 27.7                            | 4.2 <sup>sh</sup>                | 27.95                           | -12.7                            |  |
| 30.82                           | 4.48                             | 31.04                           | +35.0                            |  |
| 35.59                           | 4.47                             | 35.61                           | +43.6                            |  |
| 45.15                           | 4.56                             | 39.12                           | -29.7                            |  |
|                                 |                                  | 43.86                           | -10.7                            |  |

The sh label denotes a shoulder.

**[1a]<sup>4+</sup>**

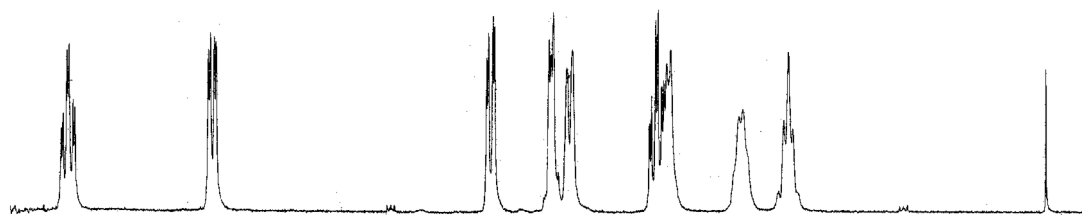

**[2a]<sup>4+</sup>**

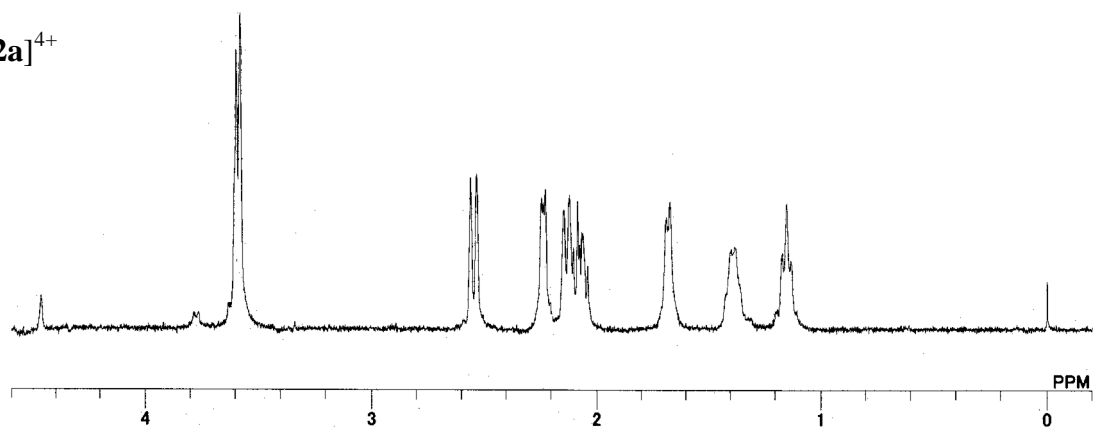

**Figure S3** <sup>1</sup>H NMR spectra of **[1a]<sup>4+</sup>** and **[2a]<sup>4+</sup>** in D<sub>2</sub>O.
